# Supplementary material
Source: Springer Nature journal article supplement (https://www.springermedizin.de/resource/supplementary/13058_2011_2883_MOESM6_ESM.pdf/9702766)

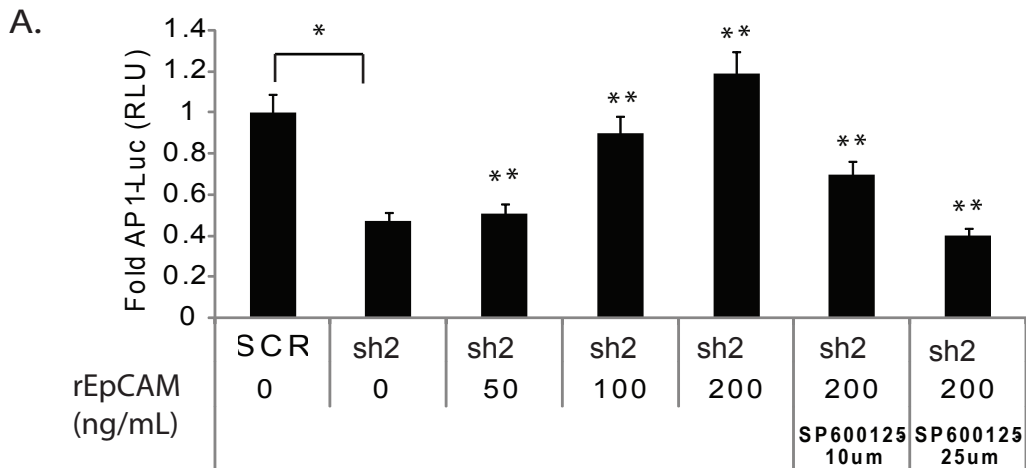

**B. IP: JNK IB JNK.**

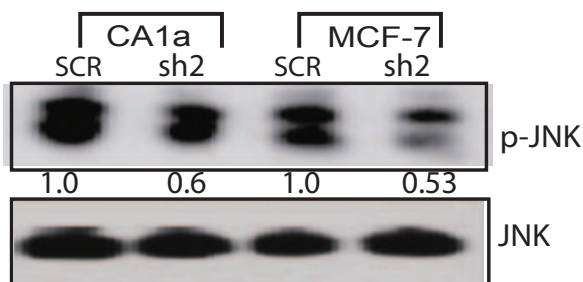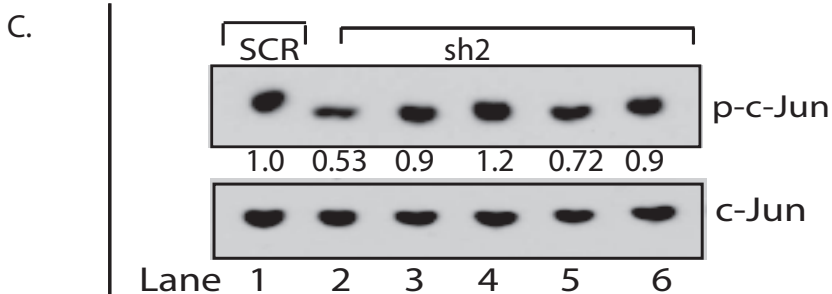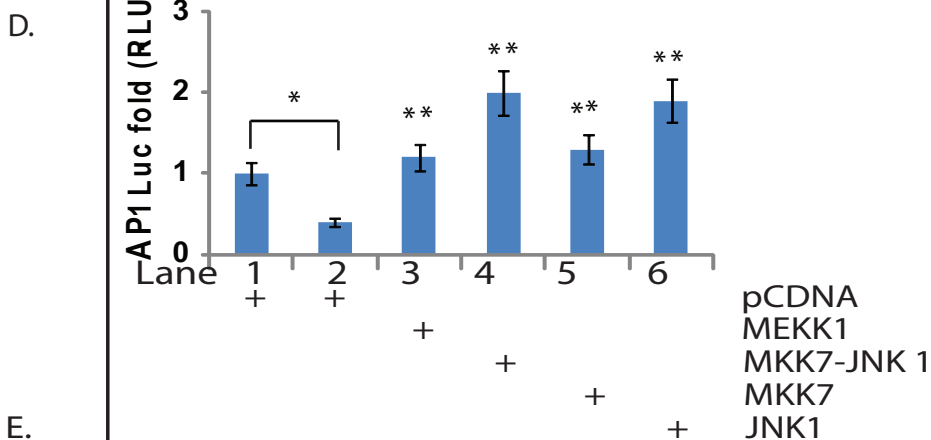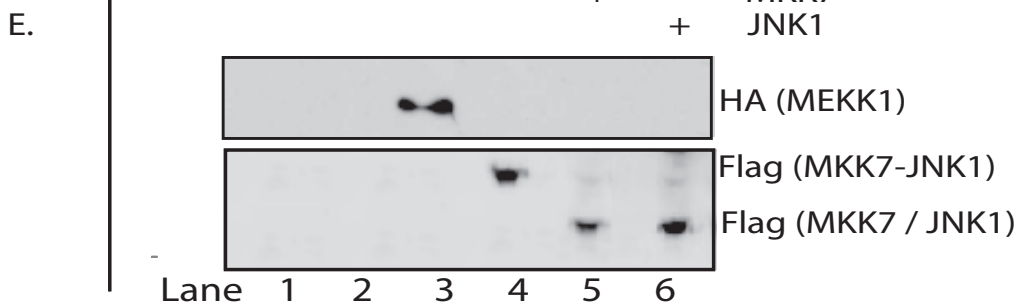

Supplement: MOESM6 [file 9702766]
